# Supplementary material for: Succession and Replacement of Bacterial Populations in the Caecum of Egg Laying Hens over Their Whole Life
Source: PubMed Central journal article supplement (PMC4264878; doi:10.1371/journal.pone.0115142), 2014-12-12

File S4. Comparison of 454 pyrosequencing performed on pooled samples and real time PCR quantification performed individually in 3 samples per time point (shown as average  $\pm$  standard deviation).

### 16S rRNA pyrosequencing

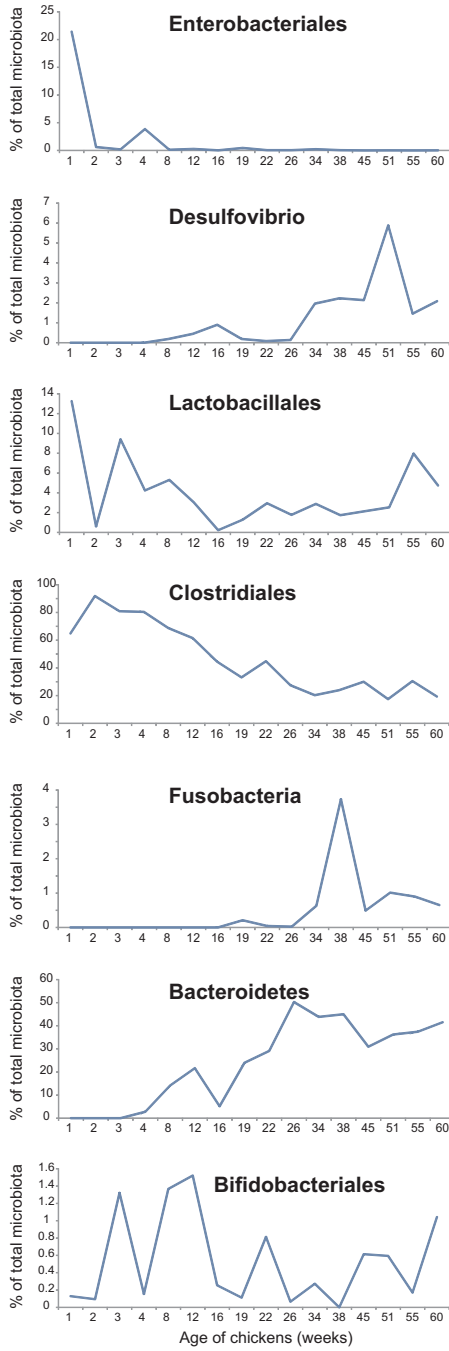

### real time PCR

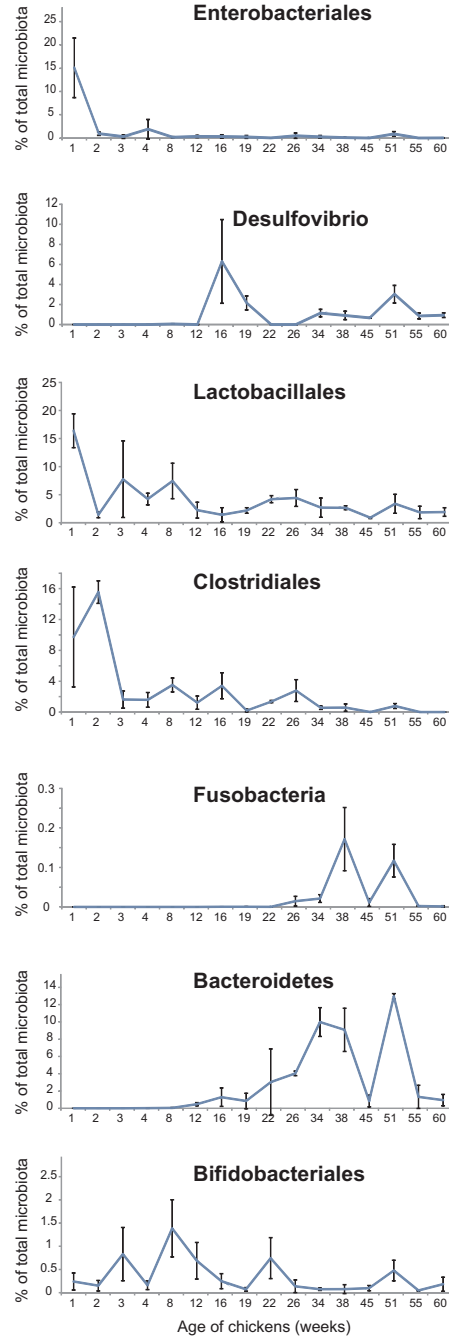

Supplement: pone.0115142.s004.pdf [file pone.0115142.s004.pdf]
